# Supplementary material
Source: HighWire-hosted journal article supplement (https://oem.bmj.com/content/74/2/130)
Supplement: inline-supplementary-material-1 [file inline-supplementary-material-1.pdf]

## **ONLINE SUPPLEMENT**

### **Development of a Job-Task-Exposure Matrix to assess occupational exposure to disinfectants among U.S. nurses**

Quinot C, Dumas O, Henneberger PK, Varraso R, Wiley AS, Speizer FE, Goldberg M, Zock JP, Camargo CA Jr, Le Moual N

**Table E1. Design of the 3 methods to evaluate occupational exposures by JEM and JTEM, example for exposure to hypochlorite bleach among emergency room nurses**

| <b>Method 1:</b> Based on the frequency of weekly exposure                            |                                                                                                                                                                                                                                                                                                           | <b>Method 2:</b> Based on the percentage of a score, combining frequency & intensity of exposure, greater than 2 |                                                                                                                                                                                                                                                                                                              | <b>Method 3:</b> Based on the value of a weighted score using the frequency of exposure |                                                                                                                                                                                                                                                                                                       |
|---------------------------------------------------------------------------------------|-----------------------------------------------------------------------------------------------------------------------------------------------------------------------------------------------------------------------------------------------------------------------------------------------------------|------------------------------------------------------------------------------------------------------------------|--------------------------------------------------------------------------------------------------------------------------------------------------------------------------------------------------------------------------------------------------------------------------------------------------------------|-----------------------------------------------------------------------------------------|-------------------------------------------------------------------------------------------------------------------------------------------------------------------------------------------------------------------------------------------------------------------------------------------------------|
| JEM 1<br>Job axis:<br>8 job types*                                                    | JTEM 1<br>“Job-Task” axis:<br>8 job types* x 3 tasks†                                                                                                                                                                                                                                                     | JEM 2<br>Job axis:<br>8 job types*                                                                               | JTEM 2<br>“Job-Task” axis:<br>8 job types* x 3 tasks†                                                                                                                                                                                                                                                        | JEM 3<br>Job axis:<br>8 job types*                                                      | JTEM 3<br>“Job-Task” axis:<br>8 job types* x 3 tasks†                                                                                                                                                                                                                                                 |
| Example 1                                                                             | Example 2                                                                                                                                                                                                                                                                                                 | Example 3                                                                                                        | Example 4                                                                                                                                                                                                                                                                                                    | Example 5                                                                               | Example 6                                                                                                                                                                                                                                                                                             |
| <b>38%</b> of ER nurses reported weekly use of HB                                     | 39% of ER nurses who clean only surfaces reported weekly use of HB<br>56% of ER nurses who clean at least instruments reported weekly use of HB<br>4% of ER nurses without disinfecting tasks reported weekly use of HB                                                                                   | <b>20%</b> of ER nurses had a score $\geq 2$ for HB                                                              | 19% of ER nurses who clean only surface had a score $\geq 2$ for HB<br>33% of ER nurses who clean at least instruments had a score $\geq 2$ for HB<br>0% of ER nurses without disinfecting tasks had a score $\geq 2$ for HB                                                                                 | ER nurses had a score of <b>105</b> for HB                                              | ER nurses who clean only surfaces had a score of 108 for HB<br>ER nurses who clean at least instruments had a score of 156 for HB<br>ER nurses without disinfecting tasks had a score of 9 for HB                                                                                                     |
| <b>Cuf-offs of Hypochlorite Bleach</b>                                                |                                                                                                                                                                                                                                                                                                           |                                                                                                                  |                                                                                                                                                                                                                                                                                                              |                                                                                         |                                                                                                                                                                                                                                                                                                       |
| - 0 (low exposure): percentage less than 11%                                          |                                                                                                                                                                                                                                                                                                           | - 0 (low exposure): less than 5% of score $\geq 2$                                                               |                                                                                                                                                                                                                                                                                                              | - 0 (low exposure): weighted score less than 24                                         |                                                                                                                                                                                                                                                                                                       |
| - 1 (medium exposure): percentage from 1% to 30.9%                                    |                                                                                                                                                                                                                                                                                                           | - 1 (medium exposure): between 5 and 10.9 % of score $\geq 2$                                                    |                                                                                                                                                                                                                                                                                                              | - 1 (medium exposure): weighted score between 24 and 81.9                               |                                                                                                                                                                                                                                                                                                       |
| - 2 (high exposure): percentage greater or equal to <b>31%</b>                        |                                                                                                                                                                                                                                                                                                           | - 2 (high exposure): greater or equal to <b>11%</b> of score $\geq 2$                                            |                                                                                                                                                                                                                                                                                                              | - 2 (high exposure): score greater or equal to <b>82</b>                                |                                                                                                                                                                                                                                                                                                       |
| <b>38%</b> is greater than <b>31%</b> → ER nurses classified with high exposure to HB | 39% is higher than 31% → ER nurses who clean only surfaces classified with high exposure to HB<br>56% is higher than 31% → ER nurses who clean at least instruments classified with high exposure to HB<br>4% is lower than 11% → ER nurses without disinfecting tasks classified with low exposure to HB | <b>20%</b> is greater than <b>11%</b> → ER nurses classified with high exposure to HB                            | 19% is higher than 11% → ER nurses who clean only surfaces classified with high exposure to HB<br>33% is higher than 11% → ER nurses who clean at least instruments were classified with high exposure to HB<br>0% is lower than 5% → ER nurses without disinfecting tasks are classified low exposure to HB | <b>105</b> is greater than <b>82</b> → ER nurses classified with high exposure to HB    | 108 is higher than 82 → ER nurses who clean only surfaces classified with high exposure to HB<br>156 is higher than 82 → ER nurses who clean at least instruments classified with high exposure to HB<br>9 is lower than 24 → ER nurses without disinfecting tasks classified with low exposure to HB |

HB: hypochlorite bleach; Frequency of exposure: 0:non-weekly exposed, 1:exposed 1-3 d/wk, 2:4-7 d/wk (Q14, Figure E2); Intensity: 1:exposed <1h/d, 2:1-4h/d, 3:>4h/d (Q15, Figure E2)

\* Emergency room (ER), operating room, intensive care unit, other inpatient nurse, outpatient/community, other hospital nursing, nursing outside hospital, nursing education or administration ; † use disinfectants to clean surfaces only, to clean instruments (with/without surfaces), none

The first method of exposure assessment was based on the frequency of exposure in 2 categories (0:non-weekly exposed (never or <1 day/week), 1:exposed (1-3 or 4-7 days/week)).

The second method was based on a score (ranged 0 to 6; 0:non-weekly exposed, 1:exposed 1-3 days/week(d/w) & <1 hour/day(h/d), 2:1-3 d/w & 1-4 h/d or 4-7d/w & <1h/d, 3:1-3 d/w & >4 h/d, 4:4-7 d/w & 1-4 h/d, 5:4-7 d/w & 1-4 h/d, 6:4-7 d/w & >4 h/d) combining frequency and intensity of exposure. The score was calculated for each nurse with the assumption that intensity was the same for all disinfectants used. Then, the score was classified in 3 levels: non-weekly exposed (score=0), low frequency and intensity of exposure (score=1), weekly exposed at moderate/high intensity (score $\geq 2$ ). To design the JEM and the JTEM, the percentage of the category score $\geq 2$  was used.

The third method was based on a weighted score according to the frequency of exposure to specific chemicals using the frequency weighted by 2 (1-3 d/wk) and 5 (4-7 d/wk), e.g. 2\*(% exposure 1-3 d/wk) + 5\*(% exposure 4-7 d/wk).

**Table E2. Cut-offs for the 3 methods**

|                                      | <b>Method 1</b>                           |                            |                          | <b>Method 2</b>                      |                            |                          | <b>Method 3</b>                                   |                            |                          |
|--------------------------------------|-------------------------------------------|----------------------------|--------------------------|--------------------------------------|----------------------------|--------------------------|---------------------------------------------------|----------------------------|--------------------------|
|                                      | <b>Self-reported weekly exposures (%)</b> |                            |                          | <b>Score <math>\geq 2</math> (%)</b> |                            |                          | <b>Weighted score based on exposure frequency</b> |                            |                          |
|                                      | <b>0 : Low exposure</b>                   | <b>1 : Medium exposure</b> | <b>2 : High exposure</b> | <b>0 : Low exposure</b>              | <b>1 : Medium exposure</b> | <b>2 : High exposure</b> | <b>0 : Low exposure</b>                           | <b>1 : Medium exposure</b> | <b>2 : High exposure</b> |
| <b>Alcohol</b>                       | <30                                       | 30-49.9                    | $\geq 50$                | <10                                  | 10-20.9                    | $\geq 21$                | <83                                               | 83-146.9                   | $\geq 147$               |
| <b>Hypochlorite bleach</b>           | <11                                       | 11-30.9                    | $\geq 31$                | <5                                   | 5-10.9                     | $\geq 11$                | <24                                               | 24-81.9                    | $\geq 82$                |
| <b>Peroxide bleach</b>               | <5                                        | 5-9.9                      | $\geq 10$                | <5                                   | 5-9.9                      | $\geq 10$                | <10                                               | 10-39.9                    | $\geq 40$                |
| <b>Glutaraldehyde</b>                | <5                                        | 5-9.9                      | $\geq 10$                | <5                                   | 5-9.9                      | $\geq 10$                | <10                                               | 10-39.9                    | $\geq 40$                |
| <b>Quaternary ammonium compounds</b> | <5                                        | 5-18.9                     | $\geq 19$                | <5                                   | 5-9.9                      | $\geq 10$                | <15                                               | 15-60.9                    | $\geq 61$                |
| <b>Enzymatic cleaners</b>            | <5                                        | 5-9.9                      | $\geq 10$                | <5                                   | 5-9.9                      | $\geq 10$                | <10                                               | 10-39.9                    | $\geq 40$                |
| <b>Formaldehyde</b>                  | <5                                        | 5-9.9                      | $\geq 10$                | <5                                   | 5-9.9                      | $\geq 10$                | <10                                               | 10-39.9                    | $\geq 40$                |
| <b>Use spray or aerosol</b>          | <10                                       | 10-22.9                    | $\geq 23$                | <5                                   | 5-9.9                      | $\geq 10$                | <24                                               | 24-65.9                    | $\geq 66$                |

**Table E3. Description of the use of disinfectants per nursing jobs**

|                                        | All<br>(n=9,021) | Use of disinfectants for instruments or surfaces |                          |                            |                            |
|----------------------------------------|------------------|--------------------------------------------------|--------------------------|----------------------------|----------------------------|
|                                        |                  | Never<br>(n=2,100)                               | <1 day/week<br>(n=1,773) | 1-3 days/week<br>(n=2,956) | 4-7 days/week<br>(n=2,192) |
| <b>Current job, %</b>                  |                  |                                                  |                          |                            |                            |
| Emergency room                         | 433              | 5.1                                              | 6.9                      | 56.4                       | 31.6                       |
| Operating room                         | 1,068            | 5.8                                              | 13.7                     | 33.0                       | 47.5                       |
| Intensive care unit                    | 760              | 4.6                                              | 13.8                     | 63.8                       | 17.8                       |
| Other inpatient nurse                  | 1,155            | 11.2                                             | 17.7                     | 46.7                       | 24.4                       |
| Outpatient or community                | 2,074            | 26.2                                             | 20.6                     | 27.2                       | 26.0                       |
| Other hospital nursing                 | 900              | 20.2                                             | 20.8                     | 30.6                       | 28.4                       |
| Nursing outside hospital               | 1,222            | 34.0                                             | 20.4                     | 23.5                       | 22.2                       |
| Nursing in education or administration | 1,409            | 50.5                                             | 30.3                     | 14.7                       | 4.5                        |

Weekly use: 1-3 days/week or 4-7 days/week

**Table E4. Percentage of self-reported weekly use of disinfectants and spray, used to create Job- and Job-Task -Exposure Matrix - Method 1**

| Jobs                                          | Tasks | n                           | Alcohol |      | Hypochlorite bleach |      | Peroxide bleach |      | Glutaraldehyde |      | Quats |      | Enzymatic cleaners |      | Formaldehyde |      | Spray |      |   |
|-----------------------------------------------|-------|-----------------------------|---------|------|---------------------|------|-----------------|------|----------------|------|-------|------|--------------------|------|--------------|------|-------|------|---|
|                                               |       |                             | %       | E    | %                   | E    | %               | E    | %              | E    | %     | E    | %                  | E    | %            | E    | %     | E    |   |
| <b>Emergency Room</b>                         | JEM1  | 433                         | 45.9    | 1    | 37.9                | 2    | 20.6            | 2    | 11.5           | 2    | 21.4  | 2    | 3.4                | 0    | 0.5          | 0    | 27.8  | 2    |   |
|                                               | JTEM1 | Clean only surfaces         | 287     | 47.5 | 1                   | 38.9 | 2               | 18.7 | 2              | 11.5 | 2     | 21.6 | 2                  | 1.6  | 0            | 0.4  | 0     | 23.0 | 2 |
|                                               |       | Clean at least instruments* | 91      | 63.5 | 2                   | 56.1 | 2               | 37.5 | 2              | 18.0 | 2     | 32.6 | 2                  | 11.0 | 2            | 1.3  | 0     | 53.3 | 2 |
|                                               |       | No disinfecting tasks       | 49      | 10.6 | 0                   | 4.4  | 0               | 4.4  | 0              | 0.0  | 0     | 2.1  | 0                  | 0.0  | 0            | 0.0  | 0     | 8.2  | 0 |
| <b>Operating Room</b>                         | JEM1  | 1,074                       | 47.7    | 1    | 24.0                | 1    | 17.1            | 2    | 11.3           | 2    | 19.9  | 2    | 16.6               | 2    | 30.4         | 2    | 28.3  | 2    |   |
|                                               | JTEM1 | Clean only surfaces         | 574     | 45.8 | 1                   | 23.7 | 1               | 15.8 | 2              | 10.4 | 2     | 24.1 | 2                  | 14.5 | 2            | 31.9 | 2     | 28.0 | 2 |
|                                               |       | Clean at least instruments* | 279     | 67.9 | 2                   | 36.0 | 2               | 28.1 | 2              | 19.5 | 2     | 22.8 | 2                  | 29.2 | 2            | 41.3 | 2     | 41.7 | 2 |
|                                               |       | No disinfecting tasks       | 204     | 25.0 | 0                   | 9.1  | 0               | 5.6  | 1              | 2.6  | 0     | 4.6  | 0                  | 5.2  | 1            | 11.1 | 2     | 10.3 | 1 |
| <b>Intensive Care Unit</b>                    | JEM1  | 763                         | 56.9    | 2    | 37.7                | 2    | 12.1            | 2    | 8.8            | 1    | 23.7  | 2    | 0.9                | 0    | 0.1          | 0    | 16.8  | 1    |   |
|                                               | JTEM1 | Clean only surfaces         | 306     | 56.4 | 2                   | 35.3 | 2               | 9.9  | 1              | 6.6  | 1     | 28.0 | 2                  | 0.4  | 0            | 0.3  | 0     | 15.8 | 1 |
|                                               |       | Clean at least instruments* | 310     | 68.4 | 2                   | 51.1 | 2               | 18.5 | 2              | 14.6 | 2     | 23.9 | 2                  | 1.8  | 0            | 0.0  | 0     | 21.4 | 1 |
|                                               |       | No disinfecting tasks       | 134     | 32.6 | 1                   | 14.3 | 1               | 3.8  | 0              | 2.3  | 0     | 13.4 | 1                  | 0.0  | 0            | 0.0  | 0     | 8.3  | 0 |
| <b>Other Inpatient nurse</b>                  | JEM1  | 1,158                       | 51.0    | 2    | 31.9                | 2    | 8.5             | 1    | 7.6            | 1    | 17.1  | 1    | 3.1                | 0    | 2.3          | 0    | 18.2  | 1    |   |
|                                               | JTEM1 | Clean only surfaces         | 443     | 50.7 | 2                   | 29.1 | 1               | 7.1  | 1              | 9.0  | 1     | 21.6 | 2                  | 2.5  | 0            | 2.9  | 0     | 20.2 | 1 |
|                                               |       | Clean at least instruments* | 367     | 66.3 | 2                   | 53.8 | 2               | 13.7 | 2              | 11.9 | 2     | 21.3 | 2                  | 6.2  | 1            | 2.9  | 0     | 25.6 | 2 |
|                                               |       | No disinfecting tasks       | 330     | 33.7 | 1                   | 11.4 | 1               | 4.4  | 0              | 1.6  | 0     | 6.0  | 1                  | 0.6  | 0            | 0.9  | 0     | 7.3  | 0 |
| <b>Outpatient or community</b>                | JEM1  | 2,086                       | 42.1    | 1    | 17.8                | 1    | 8.0             | 1    | 7.7            | 1    | 13.6  | 1    | 3.9                | 0    | 2.3          | 0    | 21.5  | 1    |   |
|                                               | JTEM1 | Clean only surfaces         | 709     | 50.0 | 2                   | 26.8 | 1               | 9.7  | 1              | 10.0 | 2     | 22.5 | 2                  | 2.7  | 0            | 1.8  | 0     | 30.1 | 2 |
|                                               |       | Clean at least instruments* | 387     | 67.0 | 2                   | 36.6 | 2               | 20.5 | 2              | 22.5 | 2     | 24.5 | 2                  | 15.2 | 2            | 8.8  | 1     | 36.4 | 2 |
|                                               |       | No disinfecting tasks       | 957     | 26.6 | 0                   | 4.1  | 0               | 1.6  | 0              | 0.6  | 0     | 2.8  | 0                  | 0.3  | 0            | 0.2  | 0     | 8.8  | 0 |
| <b>Other hospital nursing</b>                 | JEM1  | 904                         | 33.6    | 1    | 21.0                | 1    | 8.8             | 1    | 9.1            | 1    | 14.0  | 1    | 3.9                | 0    | 4.2          | 0    | 16.6  | 1    |   |
|                                               | JTEM1 | Clean only surfaces         | 359     | 39.5 | 1                   | 23.4 | 1               | 10.4 | 2              | 9.3  | 1     | 20.2 | 2                  | 4.2  | 0            | 4.7  | 0     | 21.7 | 1 |
|                                               |       | Clean at least instruments* | 165     | 66.9 | 2                   | 48.1 | 2               | 21.6 | 2              | 25.2 | 2     | 25.8 | 2                  | 11.6 | 2            | 10.7 | 2     | 31.5 | 2 |
|                                               |       | No disinfecting tasks       | 365     | 13.5 | 0                   | 7.0  | 0               | 1.9  | 0              | 2.2  | 0     | 2.5  | 0                  | 0.3  | 0            | 0.8  | 0     | 4.7  | 0 |
| <b>Nursing outside hospital</b>               | JEM1  | 1,233                       | 36.1    | 1    | 18.9                | 1    | 7.8             | 1    | 6.1            | 1    | 8.1   | 1    | 2.0                | 0    | 0.8          | 0    | 24.4  | 2    |   |
|                                               | JTEM1 | Clean only surfaces         | 351     | 50.0 | 2                   | 33.0 | 2               | 11.5 | 2              | 7.9  | 1     | 16.9 | 1                  | 1.5  | 0            | 0.6  | 0     | 44.0 | 2 |
|                                               |       | Clean at least instruments* | 202     | 68.7 | 2                   | 41.1 | 2               | 20.0 | 2              | 21.1 | 2     | 16.7 | 1                  | 10.0 | 2            | 3.1  | 0     | 48.3 | 2 |
|                                               |       | No disinfecting tasks       | 658     | 18.9 | 0                   | 4.8  | 0               | 2.3  | 0              | 0.5  | 0     | 1.1  | 0                  | 0.0  | 0            | 0.2  | 0     | 6.4  | 0 |
| <b>Nursing in education or administration</b> | JEM1  | 1,422                       | 16.5    | 0    | 10.0                | 0    | 3.2             | 0    | 1.4            | 0    | 4.0   | 0    | 0.5                | 0    | 0.2          | 0    | 7.9   | 0    |   |
|                                               | JTEM1 | Clean only surfaces         | 226     | 48.4 | 1                   | 34.4 | 2               | 13.3 | 2              | 4.2  | 0     | 14.2 | 1                  | 2.3  | 0            | 0.5  | 0     | 25.0 | 2 |
|                                               |       | Clean at least instruments* | 45      | 59.1 | 2                   | 63.6 | 2               | 9.3  | 1              | 7.1  | 1     | 13.9 | 1                  | 2.3  | 0            | 0.0  | 0     | 33.3 | 2 |
|                                               |       | No disinfecting tasks       | 1,128   | 8.6  | 0                   | 3.1  | 0               | 0.8  | 0              | 0.5  | 0     | 1.7  | 0                  | 0.1  | 0            | 0.2  | 0     | 3.5  | 0 |

Results are presented, for each disinfectant, as % of self-reported weekly use, and corresponding JEM / JTEM exposure level estimate. Exposure was evaluated in 3 classes (0: low; 1: medium; 2: high) using product-specific cut-offs defined from the distribution of the percentage of self-reported exposure per job and tasks.

\*Most nurses in this category reported cleaning instrument and surfaces. Results presented as percentages, unless otherwise specified. Quats: Quaternary ammonium compounds

**Table E5. Comparison of JEM and JTEM exposure assessments by hospital units - Method 1**

|                                               |           | n     | Alcohol   | Hypochlorite bleach | Peroxide bleach | Glutaraldehyde | Quats     | Enzymatic cleaners | Formaldehyde | Spray     |
|-----------------------------------------------|-----------|-------|-----------|---------------------|-----------------|----------------|-----------|--------------------|--------------|-----------|
| <b>Emergency Room</b>                         | JEM 1     | 427   | Medium    | High                | High            | High           | High      | Low                | Low          | High      |
|                                               | JTEM1     |       | 12        | 11                  | 11              | 11             | 11        | <b>79</b>          | <b>100</b>   | 11        |
|                                               | Low, %    |       | <b>67</b> | 0                   | 0               | 0              | 0         | 0                  | 0            | 0         |
|                                               | Medium, % |       | 21        | <b>89</b>           | <b>89</b>       | <b>89</b>      | <b>89</b> | 21                 | 0            | <b>89</b> |
| High, %                                       |           |       |           |                     |                 |                |           |                    |              |           |
| <b>Operating Room</b>                         | JEM 1     | 1,057 | Medium    | Medium              | High            | High           | High      | High               | High         | High      |
|                                               | JTEM1     |       | 19        | 19                  | 0               | 0              | 0         | 0                  | 0            | 0         |
|                                               | Low, %    |       | <b>54</b> | <b>54</b>           | 19              | 19             | 19        | 19                 | 0            | 19        |
|                                               | Medium, % |       | 27        | 27                  | <b>81</b>       | <b>81</b>      | <b>81</b> | <b>81</b>          | <b>100</b>   | <b>81</b> |
| High, %                                       |           |       |           |                     |                 |                |           |                    |              |           |
| <b>Intensive Care Unit</b>                    | JEM 1     | 750   | High      | High                | High            | Medium         | High      | Low                | Low          | Medium    |
|                                               | JTEM1     |       | 0         | 0                   | 18              | 18             | 0         | <b>100</b>         | <b>100</b>   | 18        |
|                                               | Low, %    |       | 18        | 18                  | 41              | <b>41</b>      | 18        | 0                  | 0            | <b>82</b> |
|                                               | Medium, % |       | <b>82</b> | <b>82</b>           | <b>41</b>       | <b>41</b>      | <b>82</b> | 0                  | 0            | 0         |
| High, %                                       |           |       |           |                     |                 |                |           |                    |              |           |
| <b>Other Inpatient nurse</b>                  | JEM 1     | 1,140 | High      | High                | Medium          | Medium         | Medium    | Low                | Low          | Medium    |
|                                               | JTEM1     |       | 0         | 0                   | 29              | 29             | 0         | <b>68</b>          | <b>100</b>   | 29        |
|                                               | Low, %    |       | 29        | 68                  | <b>39</b>       | <b>39</b>      | <b>29</b> | 32                 | 0            | <b>39</b> |
|                                               | Medium, % |       | <b>71</b> | <b>32</b>           | 32              | 32             | 71        | 0                  | 0            | 32        |
| High, %                                       |           |       |           |                     |                 |                |           |                    |              |           |
| <b>Outpatient or community</b>                | JEM 1     | 2,053 | Medium    | Medium              | Medium          | Medium         | Medium    | Low                | Low          | Medium    |
|                                               | JTEM1     |       | 47        | 47                  | 47              | 47             | 47        | <b>81</b>          | <b>81</b>    | 47        |
|                                               | Low, %    |       | <b>0</b>  | <b>34</b>           | <b>34</b>       | <b>0</b>       | <b>0</b>  | 0                  | 19           | <b>0</b>  |
|                                               | Medium, % |       | 53        | 19                  | 19              | 53             | 53        | 19                 | 0            | 53        |
| High, %                                       |           |       |           |                     |                 |                |           |                    |              |           |
| <b>Other hospital nursing</b>                 | JEM 1     | 889   | Medium    | Medium              | Medium          | Medium         | Medium    | Low                | Low          | Medium    |
|                                               | JTEM1     |       | 41        | 41                  | 41              | 41             | 41        | <b>81</b>          | <b>81</b>    | 41        |
|                                               | Low, %    |       | <b>40</b> | <b>40</b>           | <b>0</b>        | <b>40</b>      | <b>0</b>  | 0                  | 0            | <b>40</b> |
|                                               | Medium, % |       | 19        | 19                  | 59              | 19             | 59        | 19                 | 19           | 19        |
| High, %                                       |           |       |           |                     |                 |                |           |                    |              |           |
| <b>Nursing outside hospital</b>               | JEM 1     | 1,211 | Medium    | Medium              | Medium          | Medium         | Medium    | Low                | Low          | High      |
|                                               | JTEM1     |       | 54        | 54                  | 54              | 54             | 54        | <b>83</b>          | <b>100</b>   | 54        |
|                                               | Low, %    |       | <b>0</b>  | <b>0</b>            | <b>0</b>        | <b>29</b>      | <b>46</b> | 0                  | 0            | 0         |
|                                               | Medium, % |       | 46        | 46                  | 46              | 17             | 0         | 17                 | 0            | <b>46</b> |
| High, %                                       |           |       |           |                     |                 |                |           |                    |              |           |
| <b>Nursing in education or administration</b> | JEM 1     | 1,399 | Low       | Low                 | Low             | Low            | Low       | Low                | Low          | Low       |
|                                               | JTEM1     |       | <b>81</b> | <b>81</b>           | <b>81</b>       | <b>97</b>      | <b>81</b> | <b>100</b>         | <b>100</b>   | <b>81</b> |
|                                               | Low, %    |       | 16        | 0                   | 3               | 3              | 19        | 0                  | 0            | 0         |
|                                               | Medium, % |       | 3         | 19                  | 16              | 0              | 0         | 0                  | 0            | 19        |
| High, %                                       |           |       |           |                     |                 |                |           |                    |              |           |

**0**: low exposure; **1**: medium; **2**: high; Quats: Quaternary ammonium compounds

**Table E6. Comparison of the three methods to evaluate JEM and JTEM exposure**

|                                               |                   |                              | Alcohol | Hypochl. Bleach | Peroxyde Bleach | Glutaraldehyde | Quats | Enzyme cleaners | Formaldehyde | Sprays |
|-----------------------------------------------|-------------------|------------------------------|---------|-----------------|-----------------|----------------|-------|-----------------|--------------|--------|
| <b>Emergency Room</b>                         | <b>JTEM 1/2/3</b> | <b>JEM 1/2/3</b>             | 1/2/1   | 2/2/2           | 2/1/2           | 2/1/1          | 2/2/2 | 0/0/0           | 0/0/0        | 2/2/2  |
|                                               |                   | Clean only surfaces          | 1/2/1   | 2/2/2           | 2/1/2           | 2/1/1          | 2/2/2 | 0/0/0           | 0/0/0        | 2/2/1  |
|                                               |                   | Clean at least instruments * | 2/2/2   | 2/2/2           | 2/2/2           | 2/2/2          | 2/2/2 | 2/1/1           | 0/0/0        | 2/2/2  |
|                                               |                   | No disinfecting tasks        | 0/0/0   | 0/0/0           | 0/0/0           | 0/0/0          | 0/0/0 | 0/0/0           | 0/0/0        | 0/0/0  |
| <b>Operating Room</b>                         | <b>JTEM 1/2/3</b> | <b>JEM 1/2/3</b>             | 1/2/2   | 1/2/1           | 2/1/2           | 2/1/1          | 2/2/2 | 2/1/2           | 2/2/2        | 2/2/2  |
|                                               |                   | Clean only surfaces          | 1/2/2   | 1/2/1           | 2/1/2           | 2/1/1          | 2/2/2 | 2/1/2           | 2/2/2        | 2/2/2  |
|                                               |                   | Clean at least instruments * | 2/2/2   | 2/2/2           | 2/2/2           | 2/2/2          | 2/2/2 | 2/2/2           | 2/2/2        | 2/2/2  |
|                                               |                   | No disinfecting tasks        | 0/0/0   | 0/0/0           | 1/0/1           | 0/0/0          | 0/0/0 | 1/0/1           | 2/0/1        | 1/0/1  |
| <b>Intensive Care Unit</b>                    | <b>JTEM 1/2/3</b> | <b>JEM 1/2/3</b>             | 2/1/2   | 2/1/2           | 2/0/1           | 1/0/1          | 2/1/2 | 0/0/0           | 0/0/0        | 1/1/1  |
|                                               |                   | Clean only surfaces          | 2/1/2   | 2/1/2           | 1/0/1           | 1/0/1          | 2/1/2 | 0/0/0           | 0/0/0        | 1/0/1  |
|                                               |                   | Clean at least instruments * | 2/2/2   | 2/2/2           | 2/1/2           | 2/1/1          | 2/1/2 | 0/0/0           | 0/0/0        | 1/1/1  |
|                                               |                   | No disinfecting tasks        | 1/0/1   | 1/0/1           | 0/0/0           | 0/0/0          | 1/0/1 | 0/0/0           | 0/0/0        | 0/0/0  |
| <b>Other Inpatient nurse</b>                  | <b>JTEM 1/2/3</b> | <b>JEM 1/2/3</b>             | 2/1/2   | 2/1/2           | 1/0/1           | 1/0/1          | 1/1/1 | 0/0/0           | 0/0/0        | 1/1/1  |
|                                               |                   | Clean only surfaces          | 2/1/1   | 1/1/1           | 1/0/1           | 1/0/1          | 2/1/2 | 0/0/0           | 0/0/0        | 1/1/1  |
|                                               |                   | Clean at least instruments * | 2/2/2   | 2/2/2           | 2/0/1           | 2/0/1          | 2/1/2 | 1/0/1           | 0/0/0        | 2/2/2  |
|                                               |                   | No disinfecting tasks        | 1/1/1   | 1/0/1           | 0/0/0           | 0/0/0          | 1/0/1 | 0/0/0           | 0/0/0        | 0/0/0  |
| <b>Outpatient or community</b>                | <b>JTEM 1/2/3</b> | <b>JEM 1/2/3</b>             | 1/2/1   | 1/1/1           | 1/0/1           | 1/0/1          | 1/1/1 | 0/0/1           | 0/0/0        | 1/1/1  |
|                                               |                   | Clean only surfaces          | 2/2/2   | 1/1/1           | 1/0/1           | 2/0/1          | 2/2/2 | 0/0/0           | 0/0/0        | 2/2/2  |
|                                               |                   | Clean at least instruments * | 2/2/2   | 2/2/2           | 2/2/2           | 2/2/2          | 2/2/2 | 2/1/2           | 1/1/1        | 2/2/2  |
|                                               |                   | No disinfecting tasks        | 0/1/0   | 0/0/0           | 0/0/0           | 0/0/0          | 0/0/0 | 0/0/0           | 0/0/0        | 0/0/1  |
| <b>Other hospital nursing</b>                 | <b>JTEM 1/2/3</b> | <b>JEM 1/2/3</b>             | 1/1/1   | 1/1/1           | 1/0/1           | 1/1/1          | 1/1/1 | 0/0/1           | 0/0/1        | 1/1/1  |
|                                               |                   | Clean only surfaces          | 1/1/1   | 1/2/1           | 2/1/1           | 1/0/1          | 2/2/2 | 0/0/1           | 0/0/1        | 1/2/2  |
|                                               |                   | Clean at least instruments * | 2/2/2   | 2/2/2           | 2/1/2           | 2/2/2          | 2/2/2 | 2/2/2           | 2/2/1        | 2/2/2  |
|                                               |                   | No disinfecting tasks        | 0/0/0   | 0/0/0           | 0/0/0           | 0/0/0          | 0/0/0 | 0/0/0           | 0/0/0        | 0/0/0  |
| <b>Nursing outside hospital</b>               | <b>JTEM 1/2/3</b> | <b>JEM 1/2/3</b>             | 1/1/1   | 1/1/1           | 1/0/1           | 1/0/1          | 1/0/1 | 0/0/0           | 0/0/0        | 2/2/2  |
|                                               |                   | Clean only surfaces          | 2/2/2   | 2/2/2           | 2/0/1           | 1/0/1          | 1/1/1 | 0/0/0           | 0/0/0        | 2/2/2  |
|                                               |                   | Clean at least instruments * | 2/2/2   | 2/2/2           | 2/1/2           | 2/2/2          | 1/2/1 | 2/1/1           | 0/0/0        | 2/2/2  |
|                                               |                   | No disinfecting tasks        | 0/0/0   | 0/0/0           | 0/0/0           | 0/0/0          | 0/0/0 | 0/0/0           | 0/0/0        | 0/0/0  |
| <b>Nursing in education or administration</b> | <b>JTEM 1/2/3</b> | <b>JEM 1/2/3</b>             | 0/0/0   | 0/0/1           | 0/0/0           | 0/0/0          | 0/0/0 | 0/0/0           | 0/0/0        | 0/0/0  |
|                                               |                   | Clean only surfaces          | 1/1/1   | 2/1/2           | 2/0/1           | 0/0/0          | 1/1/1 | 0/0/0           | 0/0/0        | 2/1/2  |
|                                               |                   | Clean at least instruments * | 2/2/2   | 2/2/2           | 1/0/1           | 1/0/1          | 1/1/1 | 0/0/0           | 0/0/0        | 2/2/2  |
|                                               |                   | No clean                     | 0/0/0   | 0/0/0           | 0/0/0           | 0/0/0          | 0/0/0 | 0/0/0           | 0/0/0        | 0/0/0  |

Method 1 (JEM 1 and JTEM 1) was defined by taking into account the percentage of participants reporting weekly exposure;

Method 2 (JEM 2 and JTEM 2) was defined from a score combining frequency & intensity of exposure;

Method 3 (JEM 3 and JTEM 3) was defined from weighted score using the reported exposure frequency (see Tables E1 and E3 for more details)

(0: low exposure; 1: medium; 2: high)

**Table E7. Comparison of self-report, JEM and JTEM exposure assessment according to age - Method 1**

| n=9,073<br>Days/weeks         | Self-report<br>% |               | JEM1<br>exposure evaluation<br>% |      | JTEM1<br>exposure evaluation<br>% |      |
|-------------------------------|------------------|---------------|----------------------------------|------|-----------------------------------|------|
|                               | 1-3 days/week    | 4-7 days/week | medium                           | high | medium                            | high |
| <b>49-54 years (n=2,045)</b>  |                  |               |                                  |      |                                   |      |
| Alcohol                       | 25               | 15            | 61                               | 24   | 22                                | 46   |
| Hypochlorite Bleach           | 19               | 6             | 55                               | 29   | 28                                | 40   |
| Peroxide Bleach               | 7                | 3             | 57                               | 28   | 19                                | 45   |
| Glutaraldehyde                | 6                | 2             | 68                               | 17   | 17                                | 43   |
| Quaternary ammonium compounds | 10               | 7             | 57                               | 28   | 15                                | 53   |
| Enzymatic cleaners            | 3                | 2             | 0                                | 11   | 7                                 | 21   |
| Formaldehyde                  | 2                | 3             | 0                                | 11   | 5                                 | 14   |
| Spray                         | 13               | 6             | 56                               | 28   | 19                                | 45   |
| <b>55-59 years (n=3,517)</b>  |                  |               |                                  |      |                                   |      |
| Alcohol                       | 24               | 16            | 64                               | 21   | 21                                | 43   |
| Hypochlorite Bleach           | 15               | 7             | 60                               | 25   | 29                                | 35   |
| Peroxide Bleach               | 7                | 3             | 59                               | 26   | 21                                | 41   |
| Glutaraldehyde                | 5                | 2             | 67                               | 18   | 17                                | 40   |
| Quaternary ammonium compounds | 8                | 5             | 59                               | 26   | 15                                | 50   |
| Enzymatic cleaners            | 3                | 1             | 0                                | 13   | 7                                 | 20   |
| Formaldehyde                  | 3                | 3             | 0                                | 13   | 5                                 | 15   |
| Spray                         | 12               | 7             | 53                               | 32   | 18                                | 44   |
| <b>≥ 60 years (n=3,511)</b>   |                  |               |                                  |      |                                   |      |
| Alcohol                       | 26               | 13            | 64                               | 20   | 21                                | 36   |
| Hypochlorite Bleach           | 15               | 5             | 59                               | 24   | 28                                | 29   |
| Peroxide Bleach               | 7                | 2             | 61                               | 22   | 18                                | 36   |
| Glutaraldehyde                | 5                | 2             | 68                               | 15   | 17                                | 33   |
| Quaternary ammonium compounds | 8                | 4             | 61                               | 22   | 14                                | 43   |
| Enzymatic cleaners            | 3                | 1             | 0                                | 11   | 6                                 | 17   |
| Formaldehyde                  | 3                | 2             | 0                                | 11   | 4                                 | 12   |
| Spray                         | 14               | 6             | 54                               | 30   | 17                                | 37   |



**Figure E1. Flow-Chart (n=9,073)**

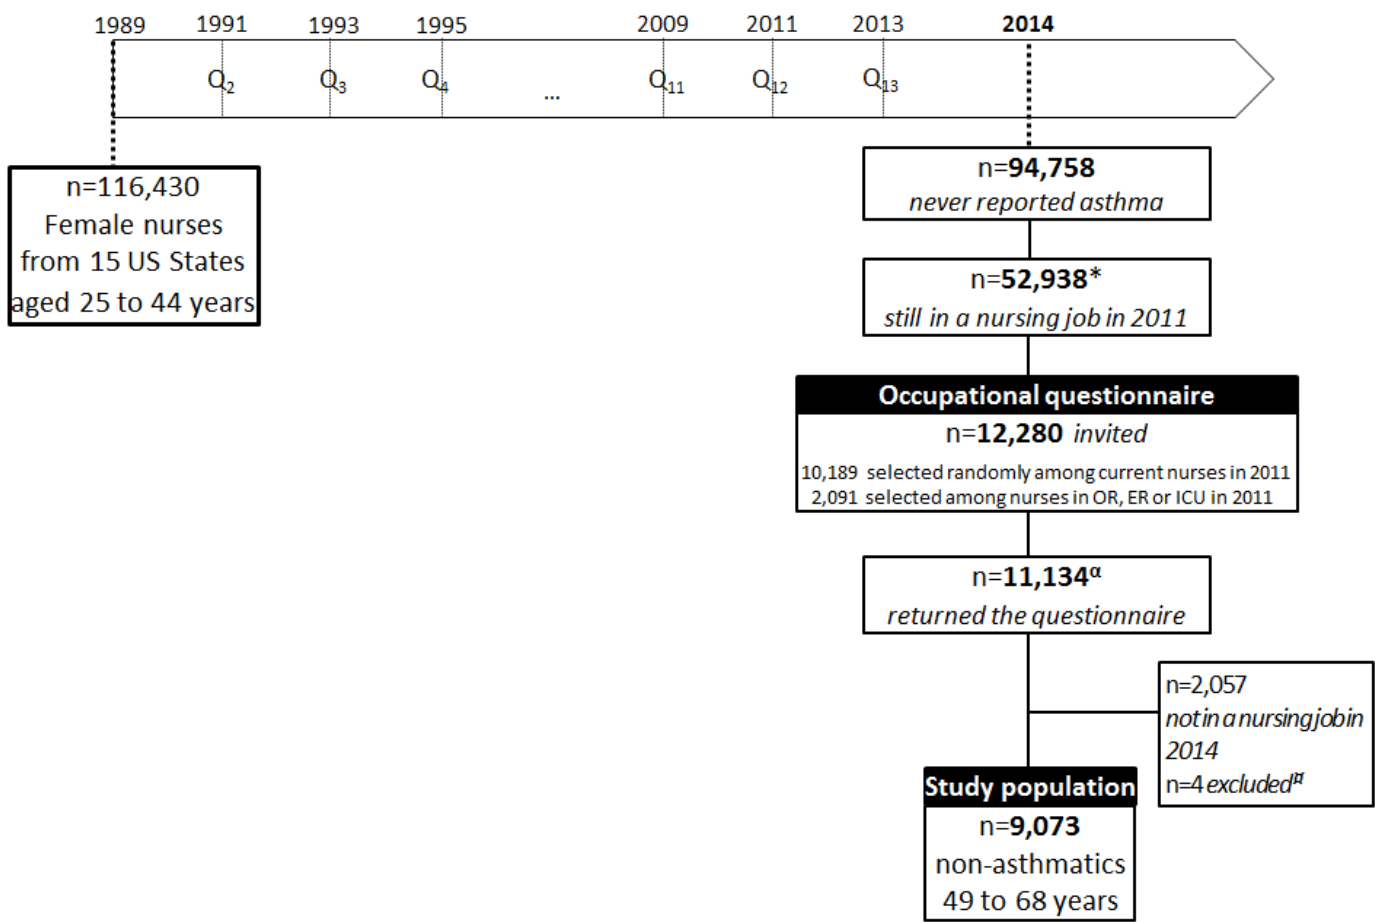

\* About 73% of them were eligible to receive a supplemental questionnaire. Eligibility was defined by having returned the 2013 biennial questionnaire at the time the supplemental questionnaire invites were sent, and not being already enrolled in another sub-study. Eligible nurses and non-eligible nurses were similar regarding the use of disinfectants in 2011.

<sup>a</sup> 91% had returned a questionnaire (9,248 for the random sample, 1,886 for the enriched sample). Enriched sample: selected at random among nurses in ER, OR and ICU (more exposed to disinfectants) in 2011.

<sup>α</sup> Decline sharing of data for this project

ER: emergency room nurse; OR: operating room nurses; ICU: intensive care unit nurses

**Figure E2. Extract of the questionnaire**

1. Which best describes your current employment status?  ER  OR  ICU  Other inpatient nurse  Nursing education or admin  
 Outpatient or community  Other hospital nursing  Nursing outside hospital  
 Non-nursing employment  F/T homemaker  Disabled  Retired  Other

If you reported non-nursing employment, fulltime homemaker, disabled, retired, or other, what year did you finish your last nursing job? →

Thinking about your current job and the use of disinfectants (such as ethylene oxide, hydrogen peroxide, ortho-phthalaldehyde, formaldehyde, glutaraldehyde, bleach):

4. On how many days per week, on average, do you clean medical instruments with disinfectants?  
 Never  <1 day/week  1-3 days/week  4-7 days/week
- 
5. On how many days per week, on average, do you clean surfaces (like floors, tables) at work with disinfectants?  
 Never  <1 day/week  1-3 days/week  4-7 days/week

| 14. On how many days per week do you use the following <u>disinfectants</u> at work?                                                             | Number of days per week |                       |                       |                       |
|--------------------------------------------------------------------------------------------------------------------------------------------------|-------------------------|-----------------------|-----------------------|-----------------------|
|                                                                                                                                                  | Never                   | <1 day per week       | 1-3 days per week     | 4-7 days per week     |
| a) Formaldehyde                                                                                                                                  | <input type="radio"/>   | <input type="radio"/> | <input type="radio"/> | <input type="radio"/> |
| b) Glutaraldehyde (e.g., Cidex, Metricide, Rapicide, Wavicide, Aldahol III)                                                                      | <input type="radio"/>   | <input type="radio"/> | <input type="radio"/> | <input type="radio"/> |
| c) Ortho-phthalaldehyde (e.g., Cidex OPA, Metricide OPA Plus, Opaciden)                                                                          | <input type="radio"/>   | <input type="radio"/> | <input type="radio"/> | <input type="radio"/> |
| d) Hypochlorite bleach, chlorine (e.g., Clorox)                                                                                                  | <input type="radio"/>   | <input type="radio"/> | <input type="radio"/> | <input type="radio"/> |
| e) Peroxide bleach, hydrogen peroxide (e.g., Accell, Optim, Resert XL, Sporox, Acecide, EndoSpore Plus, Peract, Sterad)                          | <input type="radio"/>   | <input type="radio"/> | <input type="radio"/> | <input type="radio"/> |
| f) Peracetic acid (e.g., Steris)                                                                                                                 | <input type="radio"/>   | <input type="radio"/> | <input type="radio"/> | <input type="radio"/> |
| g) Acetic acid                                                                                                                                   | <input type="radio"/>   | <input type="radio"/> | <input type="radio"/> | <input type="radio"/> |
| h) Alcohol [ethanol, methanol, isopropanol]                                                                                                      | <input type="radio"/>   | <input type="radio"/> | <input type="radio"/> | <input type="radio"/> |
| i) Ammonia                                                                                                                                       | <input type="radio"/>   | <input type="radio"/> | <input type="radio"/> | <input type="radio"/> |
| j) Quaternary ammonium compounds, "Quats" (e.g. 3M Neutral Quat 23, 3M HB Quat 25, Oasis Multi-Quat, Staphene, BTC100, BioQuat, Sentinel, Virex) | <input type="radio"/>   | <input type="radio"/> | <input type="radio"/> | <input type="radio"/> |
| k) Ethylene oxide (e.g., in compressed-gas cylinders, single-dose cartridges or glass ampules)                                                   | <input type="radio"/>   | <input type="radio"/> | <input type="radio"/> | <input type="radio"/> |
| l) Chloramine T                                                                                                                                  | <input type="radio"/>   | <input type="radio"/> | <input type="radio"/> | <input type="radio"/> |
| m) Phenolics (e.g., 3M Phenolic Disinfectant 18, WexCide, MicroBakII, Megacide, Novigard, Expose II 256)                                         | <input type="radio"/>   | <input type="radio"/> | <input type="radio"/> | <input type="radio"/> |
| n) Enzymatic cleaners (e.g., Asepti-Zyme, 3M Rapid Multi-Enzyme)                                                                                 | <input type="radio"/>   | <input type="radio"/> | <input type="radio"/> | <input type="radio"/> |
| o) 'Green' products                                                                                                                              | <input type="radio"/>   | <input type="radio"/> | <input type="radio"/> | <input type="radio"/> |
| If you don't know the active compound:<br>p) Fill in the brand name below                                                                        |                         |                       |                       |                       |
| <input type="text"/>                                                                                                                             | <input type="radio"/>   | <input type="radio"/> | <input type="radio"/> | <input type="radio"/> |
| <input type="text"/>                                                                                                                             | <input type="radio"/>   | <input type="radio"/> | <input type="radio"/> | <input type="radio"/> |
| q) Other products; don't know the name                                                                                                           | <input type="radio"/>   | <input type="radio"/> | <input type="radio"/> | <input type="radio"/> |

15. On days with disinfectant use, how many hours, on average, do you use disinfectants?  
 Less than 1 hour a day  1-4 hours per day  More than 4 hours a day
